# Supplementary material for: The effects of cis and trans butenedioic acid on the physicochemical behavior of lumefantrine
Source: Royal Society of Chemistry journal article supplement (doi:10.1039/d0ce01709d), 2021-11-09
Supplement: d0ce01709d1.pdf [file d0ce01709d1.pdf]

## The Effect of Cis and Trans Butenedioic Acid on the Physicochemical Behavior of Lumefantrine

Devendrasingh Tomar,<sup>a</sup> Anurag Lodagekar,<sup>a</sup> Anilkumar Gunnam,<sup>b</sup> Suryanarayana Allu,<sup>b</sup> Rahul B. Chavan,<sup>a</sup> Minakshi Tharkar,<sup>c</sup> T. G. Ajith kumar,<sup>c</sup> Ashwini K. Nangia,<sup>bc\*</sup> and Nalini R. Shastri<sup>a\*</sup>

<sup>a</sup> Solid-State Pharmaceutical Research Group (SSPRG), Department of Pharmaceutics, National Institute of Pharmaceutical Education and Research (NIPER), Hyderabad, 500 037, India

<sup>b</sup> School of Chemistry, University of Hyderabad, Prof. C. R. Rao Road, Gachibowli Central University P.O., Hyderabad 500 046, India

<sup>c</sup> CSIR-National Chemical Laboratory, Dr. Homi Bhabha Road, Pune 411 008, India

### \* Corresponding authors.

Nalini R Shastri

**E-mail:** [nalini.niperhyd@gmail.com](mailto:nalini.niperhyd@gmail.com), [ashwini.nangia@gmail.com](mailto:ashwini.nangia@gmail.com)

**Address:** Department of Pharmaceutics, National Institute of Pharmaceutical Education & Research (NIPER), Balanagar, Hyderabad 500 037, India

Ashwini K. Nangia

**E-mail:** [ashwini.nangia@gmail.com](mailto:ashwini.nangia@gmail.com)

**Address:** School of Chemistry, University of Hyderabad, Prof. C. R. Rao Road, Gachibowli Central University P.O., Hyderabad 500 046, India

## Electronic Supplementary Information (ESI)

**Table S1.** Result of solid-state forms of lumefantrine obtained by solvent evaporation (SE).

| Drug         | Cofomers                   | Method           | Observation              | Inference   | Melting point                  |
|--------------|----------------------------|------------------|--------------------------|-------------|--------------------------------|
| Lumefantrine | Gallic acid                | SE               | Birefringence            | Crystalline | Two separate melting points    |
|              | Vanillin                   | SE               | Birefringence            | Crystalline | Broad melting point            |
|              | Vanillic acid              | SE               | Birefringence            | Crystalline | Melting point depression       |
|              | Alanine                    | SE               | Birefringence            | Crystalline | Two melting points             |
|              | Aspartic acid              | SE               | Birefringence            | Crystalline | Two melting points             |
|              | Malic acid                 | SE               | Sticky                   | Amorphous?  | -                              |
|              | Benzoic acid               | SE               | Birefringence after 24 h | Crystalline | -                              |
|              | Citric acid                | SE               | Sticky                   | Amorphous?  | -                              |
|              | Para hydroxyl benzoic acid | SE               | Birefringence            | Crystalline | Broad melting point            |
|              | Fumaric acid               | SE               | Birefringence            | Crystalline | Single and sharp melting point |
| Maleic acid  | SE                         | No birefringence | Amorphous                | -           |                                |

**Table S2.** ATR-IR data of lumefantrine (LMF), fumaric acid (FA), maleic (MA), lumefantrine-fumaric acid 2:1 salt (LMF-FA 2:1 salt) and lumefantrine- maleic acid 1:1 coamorphous (LMF-MA 1:1 CAM).

| Compound        | Functional group                |                                    |                                                                      |                                    |                                    |
|-----------------|---------------------------------|------------------------------------|----------------------------------------------------------------------|------------------------------------|------------------------------------|
|                 | Amine group (cm <sup>-1</sup> ) | C=O stretching (cm <sup>-1</sup> ) | Dimeric hydrogen bonding between the O-H and C=O (cm <sup>-1</sup> ) | C-H stretching (cm <sup>-1</sup> ) | O-H stretching (cm <sup>-1</sup> ) |
| LMF             | 1634.14                         | -                                  | -                                                                    | 2925.95                            | 3395.30                            |
| FA              | -                               | 1660.70                            | -                                                                    | -                                  | -                                  |
| MA              | -                               | 1703.92                            | 2600.00                                                              | -                                  | -                                  |
| LMF-FA PM       | 1636                            | 1670.52                            |                                                                      | 2925.46                            | 3393.6                             |
| LMF-MA PM       | 1633.75                         | 1703.67                            | 2600.00                                                              | 2925.72                            | 3395.3                             |
| LMF-FA 2:1 salt | 1693.4                          | 1569.00                            | -                                                                    | 2964.47                            | -                                  |
| LMF-MA 1:1 CAM  | 1622.3                          | 1706.90                            | -                                                                    | 2961.43                            | -                                  |

**Table S3.** <sup>13</sup>C chemical shifts (ppm) obtained in <sup>13</sup>C ss-NMR of lumefantrine (LMF), fumaric acid (FA), maleic (MA), lumefantrine- fumaric acid 2:1 salt (LMF-FA 2:1 salt) and lumefantrine- maleic acid 1:1 coamorphous (LMF-MA 1:1 CAM).

| Position of carbon             | Lumefantrine       | LMF-FA 2:1 salt    | LMF-MA 1:1 CAM |
|--------------------------------|--------------------|--------------------|----------------|
| C21                            | 65.4               | 64.6               | 61.0           |
| C28, C24                       | 31.42              | 31.4               | -              |
| C22                            | 59.9               | 60.1               | 59.7           |
| C23 , C27                      | 53.1               | 53.9               | 53.3           |
| C25, C29                       | 19.9               | 20.7               | 20.5           |
| C7                             | 126.77             | 126.7              | 126.9          |
| C in benzene ring              | 129.79-127.22      | 127.22             | -              |
| Substitutive C in benzene ring | 142.3-140.3, 132.3 | 143.0-140.7, 132.3 | -              |
| CH in alkene                   | -                  | 135.64             | -              |
| C in C=O                       | -                  | 176.27             | 170.3          |

**Table S4.**  $^{15}\text{N}$  chemical shifts (ppm) obtained in  $^{15}\text{N}$  ssNMR of lumefantrine (LMF), lumefantrine- fumaric acid 2:1 salt (LMF-FA 2:1 salt) and lumefantrine- maleic acid 1:1 coamorphous (LMF-MA 1:1 CAM) using  $\text{NH}_4\text{Cl}$  and glycine as primary and secondary standards respectively.

|   | <b>Compound</b>                            | <b><math>^{15}\text{N}</math> Chemical shift (<math>\delta</math> ppm)</b> |
|---|--------------------------------------------|----------------------------------------------------------------------------|
| 1 | LMF                                        | 31.21                                                                      |
| 2 | LMF-MA 1:1 CAM                             | 53.47                                                                      |
| 3 | LMF-FA 2:1 salt                            | 51.75                                                                      |
| 4 | $\text{NH}_4\text{Cl}$ (Primary reference) | 0.0                                                                        |
| 5 | Glycine (secondary reference)              | 32.94                                                                      |

**Table S5.** Hydrogen bond geometry in crystal structures of lumefantrine-fumaric acid.

| <b>Interaction</b>                                                    | <b>d(D-H)</b> | <b>d(H<math>\cdots</math>A)</b> | <b>d(D<math>\cdots</math>A)</b> | <b><math>\angle(\text{DHA})</math></b> | <b>Symmetry code</b> |
|-----------------------------------------------------------------------|---------------|---------------------------------|---------------------------------|----------------------------------------|----------------------|
| $\text{O}_{1\text{A}}-\text{H}_{1\text{A}}\cdots\text{O}_{5\text{A}}$ | 0.84          | 1.71                            | 2.531(5)                        | 165                                    | x,y,1+z              |
| $\text{N}_1-\text{H}_1\cdots\text{O}_{4\text{A}}$                     | 1.00          | 1.75                            | 2.700(6)                        | 158                                    | x,y,1+z              |
| $\text{N}_1-\text{H}_1\cdots\text{O}_{3\text{B}}$                     | 1.00          | 1.62                            | 2.458(14)                       | 139                                    | x,y,1+z              |
| $\text{C}_{17}-\text{H}_{17}\cdots\text{Cl}_1$                        | 0.93          | 2.85                            | 3.760(6)                        | 163                                    | x, y, z              |
| $\text{C}_{19}-\text{H}_{19}\cdots\text{O}_{5\text{A}}$               | 0.95          | 2.25                            | 3.187(6)                        | 170                                    | x,1/2-y,1/2+z        |
| $\text{C}_{22}-\text{H}_{22\text{B}}\cdots\text{O}_{4\text{A}}$       | 1.03          | 2.55                            | 3.536(6)                        | 160                                    | 1-x,-y,1-z           |
| $\text{C}_{23}-\text{H}_{23\text{A}}\cdots\text{O}_{1\text{A}}$       | 0.99          | 2.37                            | 3.117(4)                        | 131                                    | 1-x,-y,2-z           |
| $\text{C}_3-\text{H}_3\cdots\text{O}_{1\text{A}}$                     | 0.95          | 2.53                            | 3.449(3)                        | 163                                    | x,1/2-y,-1/2+z       |

**Table S6.** Equilibrium solubility of lumefantrine, salt and coamorphous system

|                                                                                                                                     | <b>0.5 % BKC</b>                  | <b>1 % BKC</b>                   |
|-------------------------------------------------------------------------------------------------------------------------------------|-----------------------------------|----------------------------------|
| LMF                                                                                                                                 | $31.16 \pm 0.23 \mu\text{g/mL}$   | $63.07 \pm 3.68 \mu\text{g/mL}$  |
| LMF-FA 2:1 salt                                                                                                                     | $38.23 \pm 1.01 \mu\text{g/mL}$   | $61.76 \pm 1.67 \mu\text{g/mL}$  |
| LMF-MA 1:1 CAM                                                                                                                      | $132.21 \pm 17.81 \mu\text{g/mL}$ | $200.26 \pm 8.29 \mu\text{g/mL}$ |
| LMF: lumefantrine, LMF-FA 2:1 salt: lumefantrine-fumaric acid 2:1 salt and LMF-MA 1:1 CAM: lumefantrine-maleic acid 1:1 coamorphous |                                   |                                  |

**Table S7.** Dissolution parameters for lumefantrine, amorphous lumefantrine, physical mixture, salt and coamorphous system.

| <b>Dissolution parameter</b>                                                                                                                                                                                                                                                                                                                                                                                                           | <b>LMF</b> | <b>A-LMF</b> | <b>LMF-FA 2:1 salt</b> | <b>LMF-MA 1:1 CAM</b> | <b>LMF-FA PM</b> | <b>LMF-MA PM</b> |
|----------------------------------------------------------------------------------------------------------------------------------------------------------------------------------------------------------------------------------------------------------------------------------------------------------------------------------------------------------------------------------------------------------------------------------------|------------|--------------|------------------------|-----------------------|------------------|------------------|
| F2#                                                                                                                                                                                                                                                                                                                                                                                                                                    | -          | 84.87        | 20.06                  | 22.73                 | 64.40            | 86.75            |
| DE <sub>15</sub>                                                                                                                                                                                                                                                                                                                                                                                                                       | 4.34       | 4.18         | 42.77                  | 31.50                 | 4.94             | 4.23             |
| DE <sub>120</sub>                                                                                                                                                                                                                                                                                                                                                                                                                      | 17.69      | 18.13        | 66.87                  | 84.20                 | 64.73            | 61.29            |
| # with reference to plain lumefantrine<br>F2: similarity factor, DE: dissolution efficiency<br>LMF: lumefantrine, A-LMF :amorphous lumefantrine, LMF-FA 2:1 salt :lumefantrine-fumaric acid 2:1 salt, LMF-MA 1:1 CAM : lumefantrine-maleic acid1:1 coamorphous, FA PM : lumefantrine-fumaric acid physical mixture, LMF-MA1:1 CAM : lumefantrine-maleic acid 1:1 coamorphous and LMF-MA PM : lumefantrine-maleic acid physical mixture |            |              |                        |                       |                  |                  |

**Table S8.** Dissolution parameters for lumefantrine- fumaric acid 2:1 salt and lumefantrine-maleic acid 1:1 coamorphous after 1-month stability at 40 °C ± 2 °C/75% ± 5% RH.

| <b>Dissolution parameter</b>                                                                                                                                                  | <b>LMF-FA 2:1 salt</b> | <b>LMF-MA 1:1 CAM</b> |
|-------------------------------------------------------------------------------------------------------------------------------------------------------------------------------|------------------------|-----------------------|
| F2#                                                                                                                                                                           | 77.27                  | 64.78                 |
| # with reference to initial sample<br>F2: similarity factor,<br>LMF-FA 2:1 salt: lumefantrine-fumaric acid 2:1 salt, LMF-MA 1:1 CAM: lumefantrine-maleic acid 1:1 coamorphous |                        |                       |

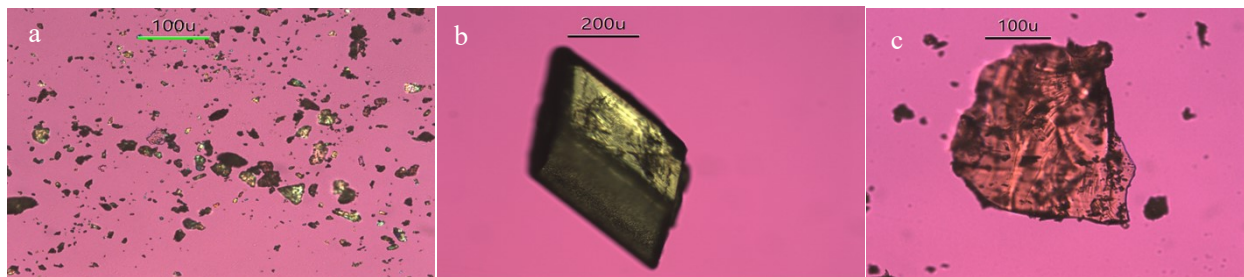

**Fig. S1** Polarized light microscopic images of crystalline lumefantrine (a), lumefantrine-fumaric acid 2:1 salt (b) and lumefantrine-maleic acid coamorphous (c).

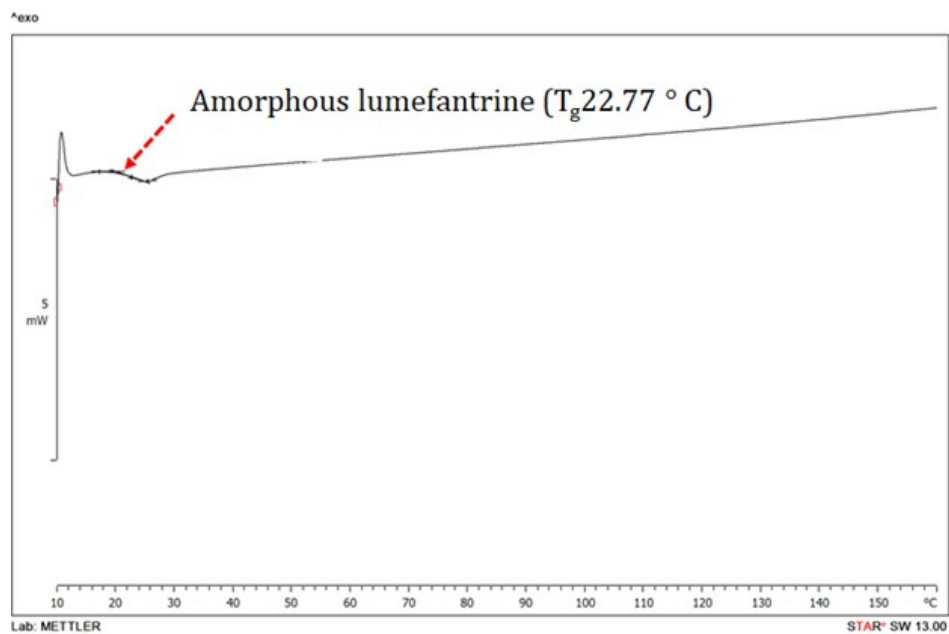

**Fig. S2** Amorphous lumefantrine and its glass transition ( $T_g$ ) event.

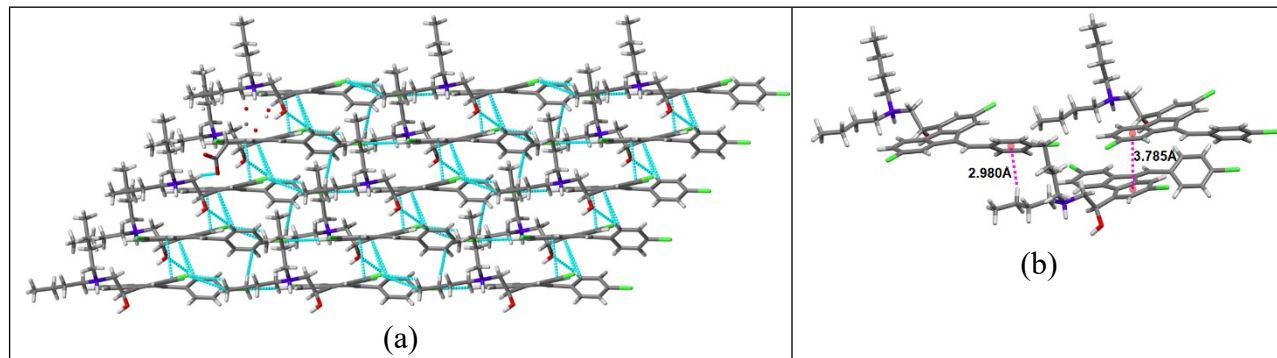

**Fig. S3** (a) Packing structure of lumefantrine units connected in 2D array (b) stabilized by weak  $\pi \cdots \pi$  and C-H $\cdots$  $\pi$  interactions.

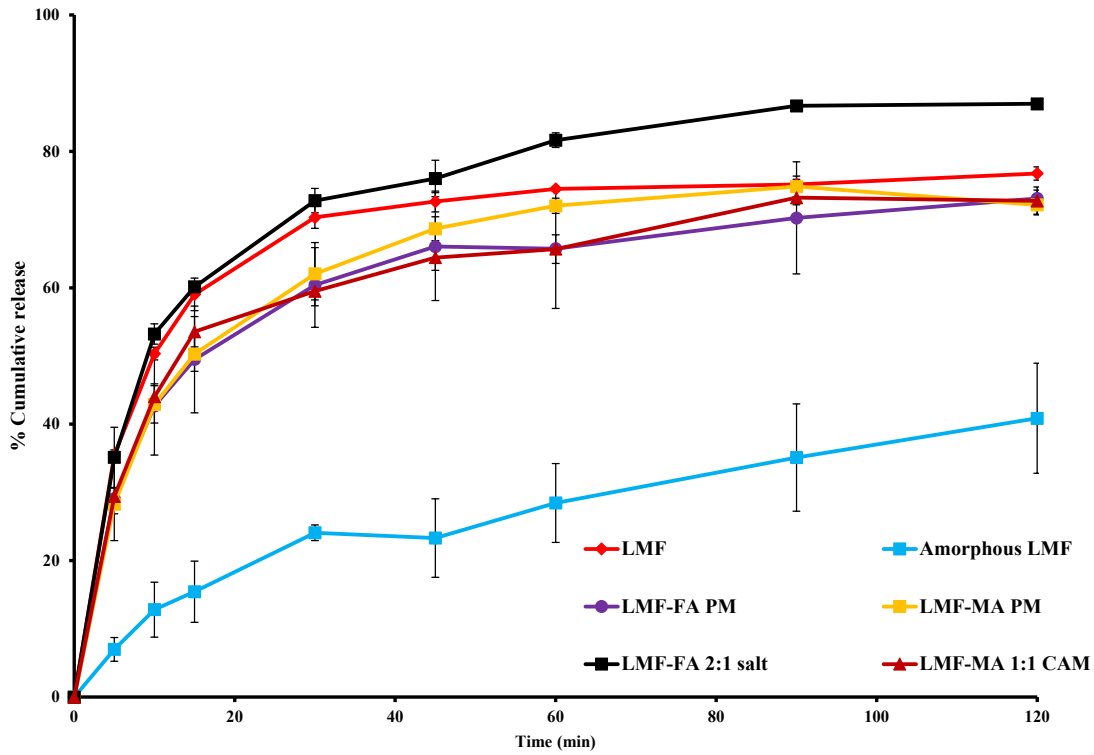

**Fig. S4** Dissolution profile lumefantrine (LMF), amorphous lumefantrine (amorphous LMF), lumefantrine- fumaric acid physical mixture (LMF-FA PM), lumefantrine-fumaric acid 2:1 salt (LMF-FA 2:1 salt), lumefantrine-maleic acid physical mixture (LMF-MA PM) and lumefantrine-maleic acid 1:1 coamorphous (LMF-MA 1:1 CAM) in 0.1N HCl containing 1 % w/v BKC.

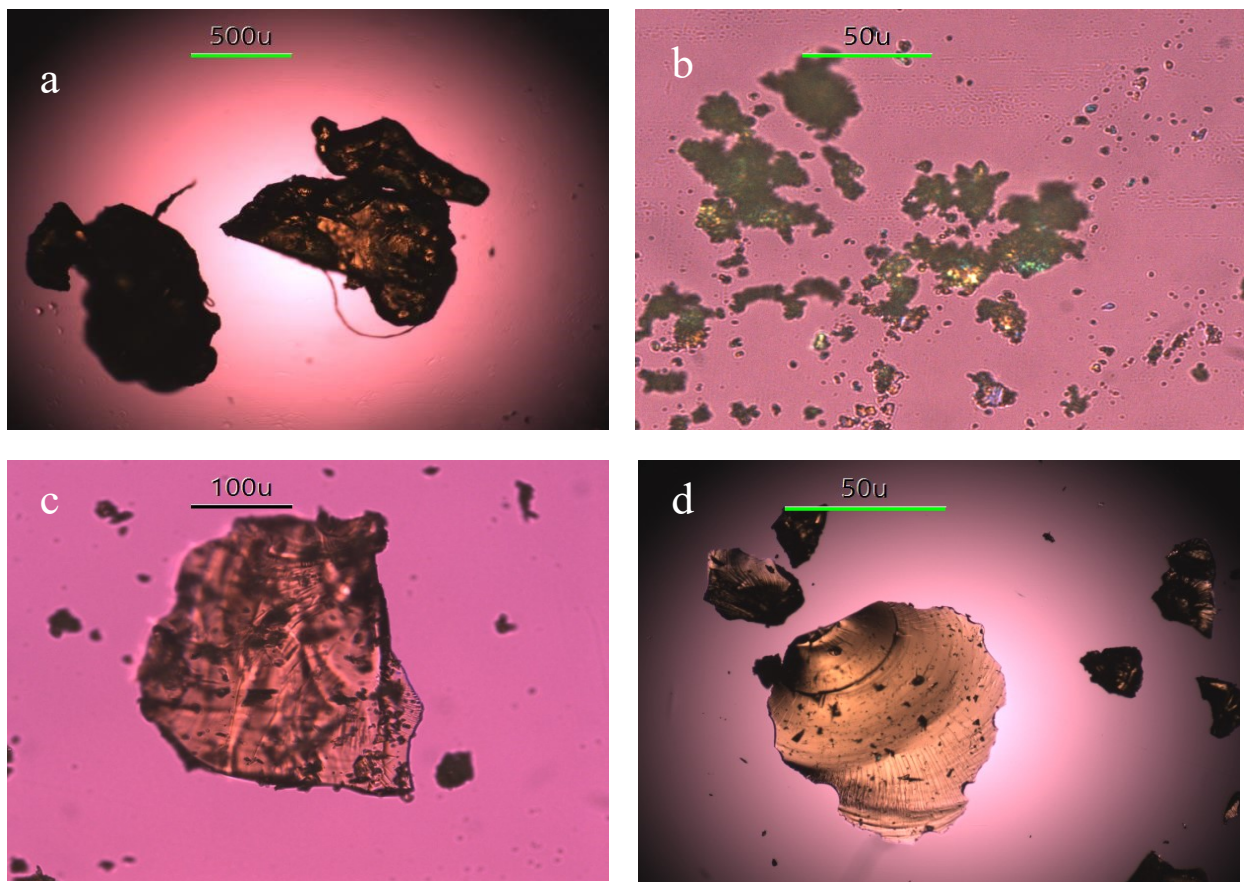

**Fig. S5** Polarized light microscopic images of amorphous lumefantrine (a) amorphous lumefantrine after stability, (b) lumefantrine-maleic acid 1:1 coamorphous before stability (c) and lumefantrine-maleic acid 1:1 coamorphous after stability (d).
